# Supplementary material for: Combinatorial therapy using RNAi and curcumin nano-architectures regresses tumors in breast and colon cancer models
Source: Royal Society of Chemistry journal article supplement (doi:10.1039/d1nr04411g), 2021-12-16
Supplement: d1nr04411g1.pdf [file d1nr04411g1.pdf]

**Supplementary Information  
for**

**Combinatorial therapy using RNAi and curcumin nano-architectures  
regress tumors in breast and colon cancer models**

<sup>\$</sup>Aviral Kumar<sup>1</sup>, <sup>\$</sup>Amarnath Singam<sup>2,3</sup>, Guruprasadh Swaminathan<sup>1</sup>, <sup>#</sup>Naresh Killi<sup>2,3</sup>, <sup>#</sup>Naveen Kumar Tangudu<sup>1</sup>, Jedy Jose<sup>1</sup>, <sup>\*</sup>Rathna Gundloori VN<sup>2,3</sup>, <sup>\*</sup>Lekha Dinesh Kumar<sup>1</sup>

<sup>1</sup>Cancer Biology, CSIR-Centre for Cellular and Molecular Biology, (CCMB) Uppal Road, Hyderabad, 500007, Telangana, India.

<sup>2</sup>Polymer Science and Engineering Division, CSIR–National Chemical Laboratory, Pune, Maharashtra 411008, India

<sup>3</sup>Academy of Scientific and Innovative Research (AcSIR), Ghaziabad, Uttar Pradesh 411008, India

<sup>\$</sup>, and <sup>#</sup> These authors contributed equally to this work.

<sup>\*</sup>Corresponding authors:

**Dr. Lekha Dinesh Kumar**, Sr. Principal Scientist, Project Leader, Cancer Biology, CSIR-CCMB, Hyderabad, India. Email id- [lekha@ccmb.res.in](mailto:lekha@ccmb.res.in)

**Dr. Rathna Gundloori VN**, Principal Scientist, Polymer Science and Engineering Division, CSIR–National Chemical Laboratory, Pune, Maharashtra 411008, India. Email id- [rv.gundloori@ncl.res.in](mailto:rv.gundloori@ncl.res.in)

**(A)** **Supplementary Figure S1**

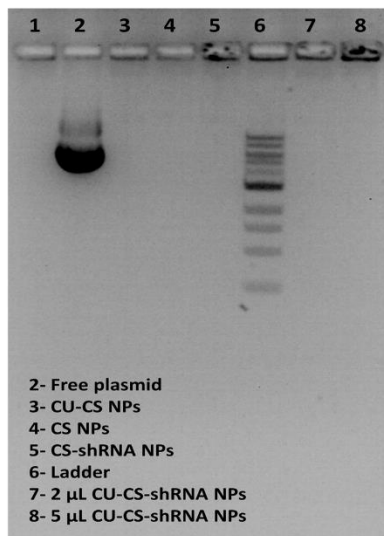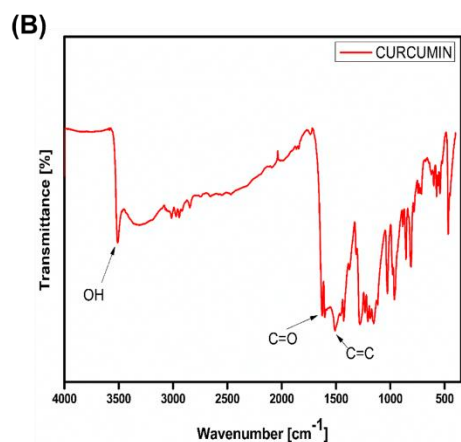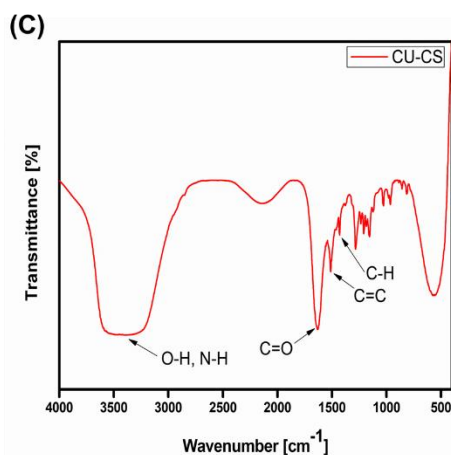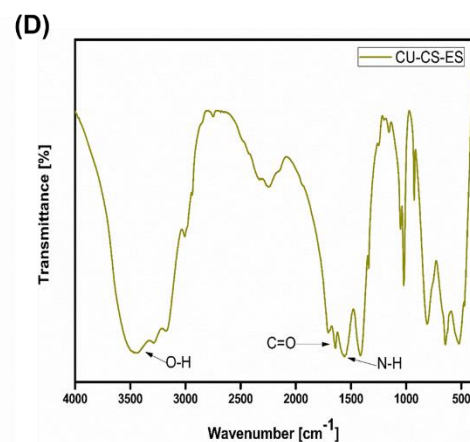

**Supplementary Figure S1: Characterization of Nanoparticles** **(A)** Gel retardation assay of bound NPs with shRNA and their respective controls. As free plasmid DNA will move faster in the gel, and the bound plasmid will get stuck in the wells. FTIR spectrum of **(B)** Bare CU, **(C)** CU coated with CS (CU-CS), **(D)** CU coated with CS and ES (CU-CS-ES)

## Supplementary Figure S2

(A) Brca2/p53 breast cancer models

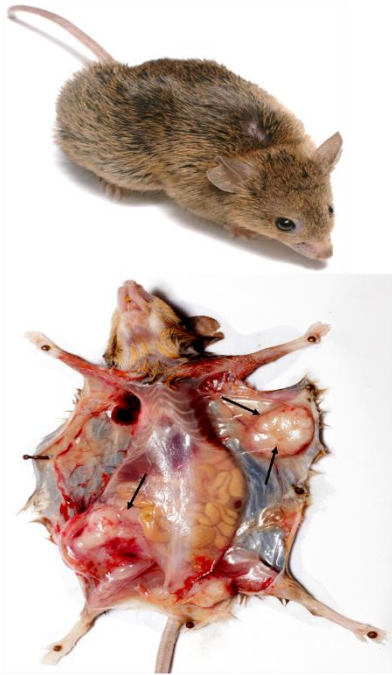

(B) Apc fl/fl colon cancer models

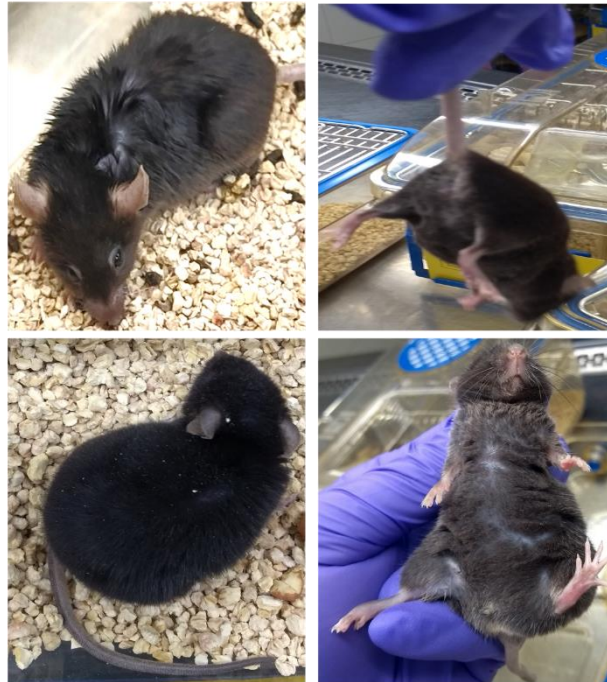

**Supplementary Figure S2: Two different murine models used in the study.** (A) Brca2/p53 breast cancer models, where the conditional Brca2/p53 knockout are controlled under Blg-cre transgene. This model develops tumors on any of the five pairs of mammary after 6-15 months of birth. (B) Apc fl/fl conditional knockout colon cancer models develops the crypt progenitor phenotype in the intestine upon induction with  $\beta$ -naphthoflavone, and tamoxifen, demonstrating a progressive knockout, causing mortality of the animal within 8-10 days. These mice show knockout phenotypes like piloerection, enlarged abdomen and rectal bleeding.

### Supplementary Figure S3

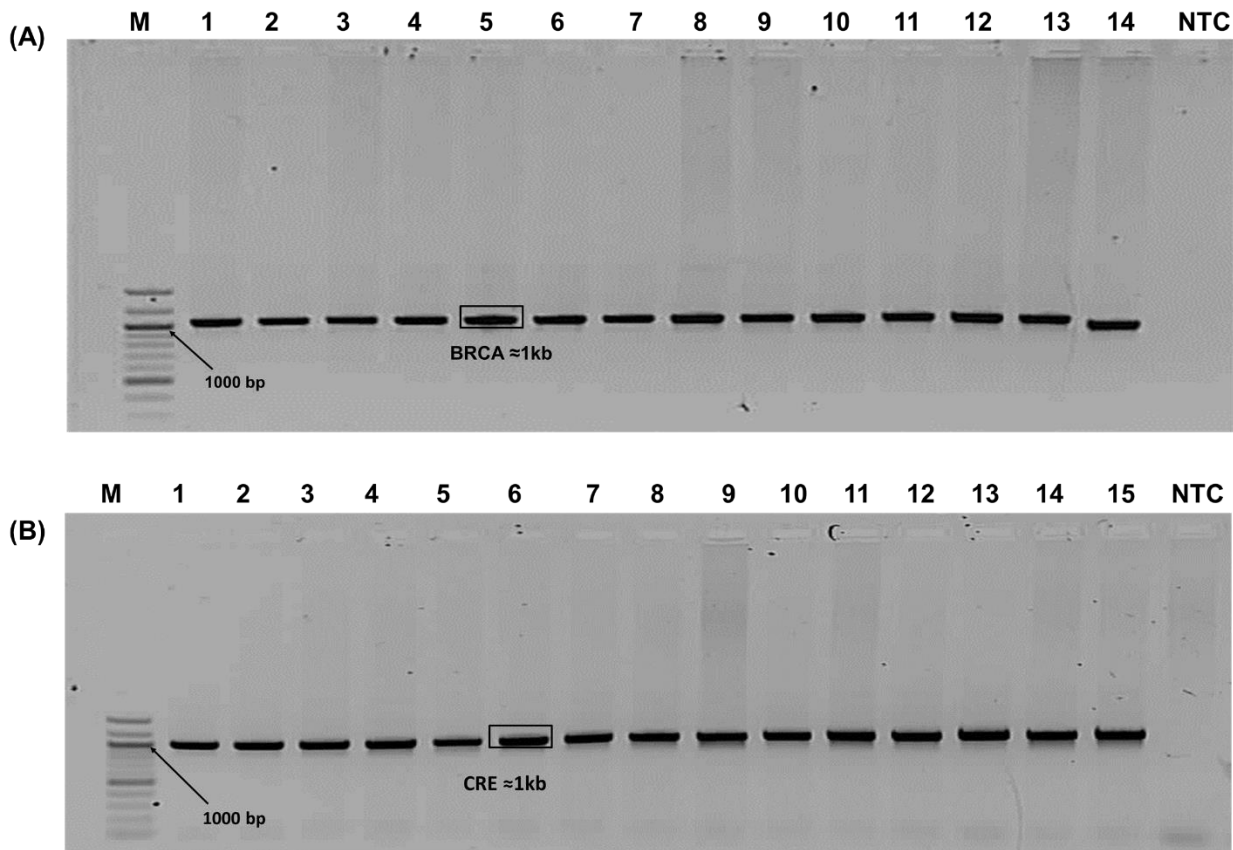

**Supplementary Figure S3: PCR products representing genotyping Brca2/p53 mutant models.** M represents DNA ladder, NTC represents non template control (without DNA) **(A)** Lanes 1-14 denotes different mice tail samples of Brca2 gene which is approximately 1000 bp. **(B)** Lanes 1-15 denotes different mice tail samples PCR products of Cre gene in Brca2/p53 mutant mice which is approximately 1000 bp.

Supplementary Figure S4

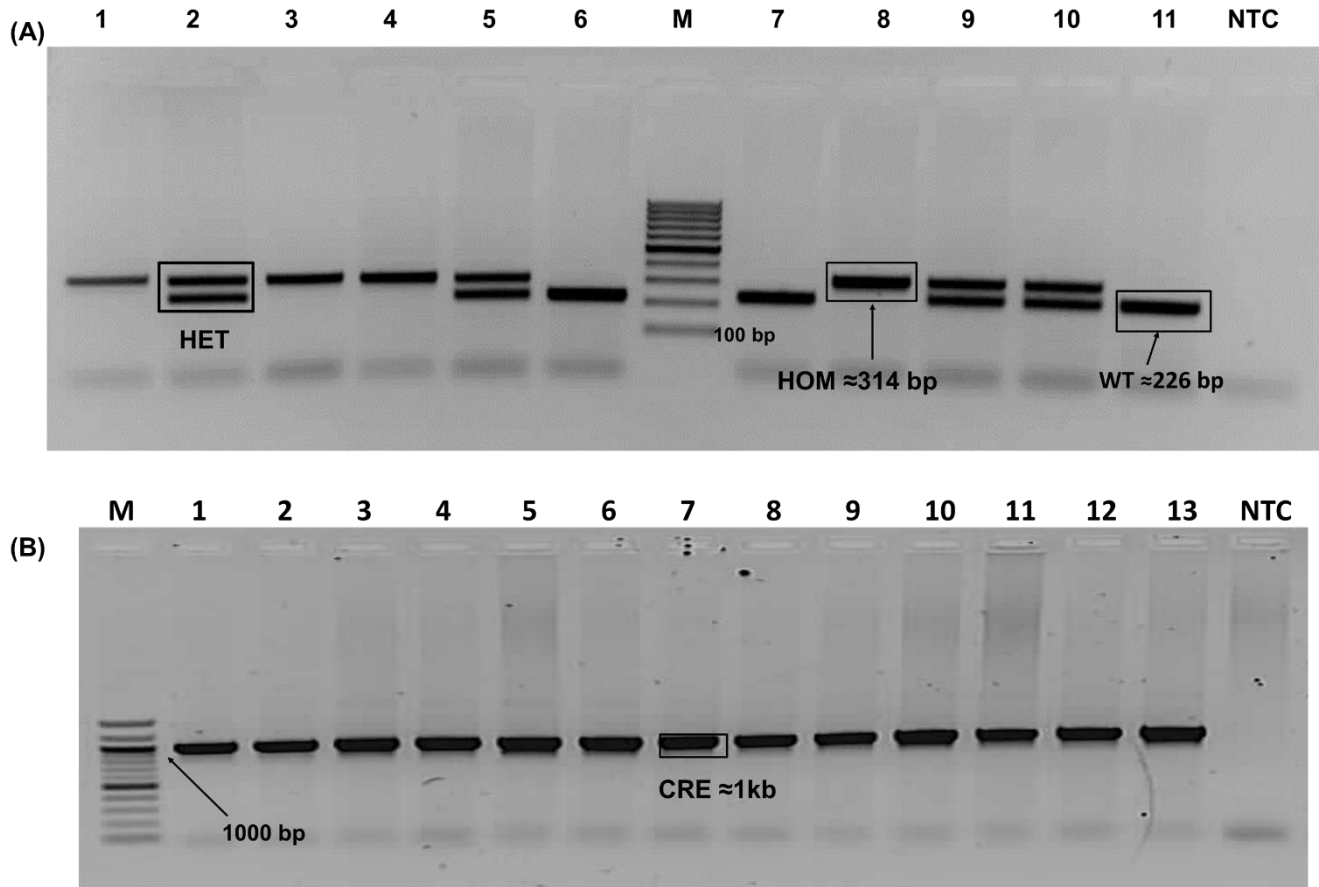

**Supplementary Figure S4: PCR products representing genotyping of AhCre-ErT Apcfl/fl colon cancer models.** M represents DNA ladder, NTC represents non template control (without DNA) **(A)** Lanes 1-6, 7-11 denotes different mice tail samples. Single band indicates homozygous (HOM) APC flox mice (~314 bp) whereas double band represents heterozygous (HET) APC flox mice and WT represents wild type like mice (~226 bp), **(B)** Lanes 1-13 denotes different mice tail samples PCR products of Cre gene in Apc knockout mice which is approximately 1000 bp.

## Supplementary Figure S5

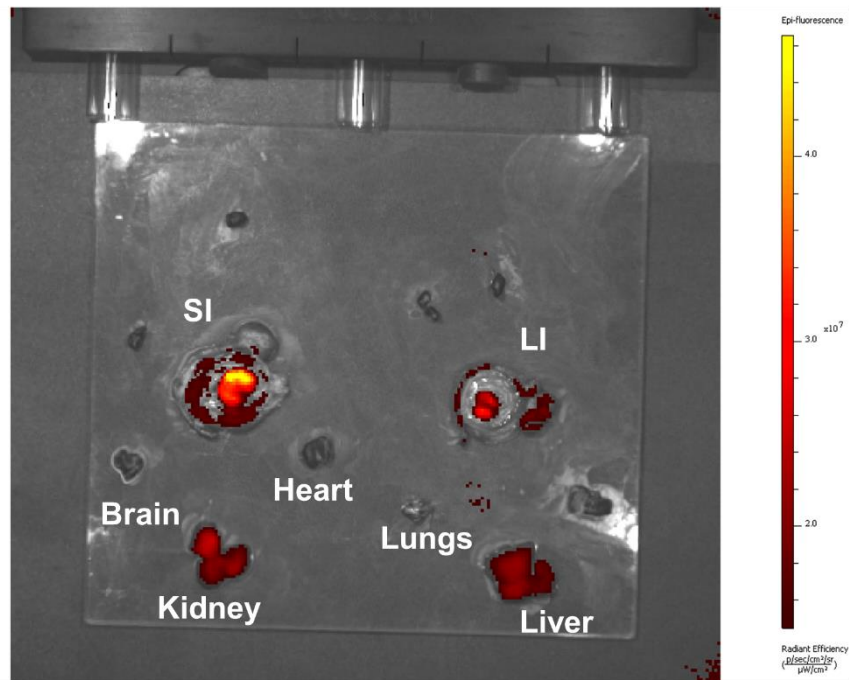

**Supplementary Figure S5: Biodistribution of the CU-CS-Ephb4 shRNA NPs conjugated with cyanine 7.5nhs ester far red dye in C57/ BALBc healthy mice after 24 hrs of treatment.** Treatment with the bio drug resulted in the localization of the CU-CS-Ephb4 shRNA NPs in the regions of small intestine (SI), large intestine (LI), liver and kidney after 24 hrs of treatment.



Supplementary Figure S6

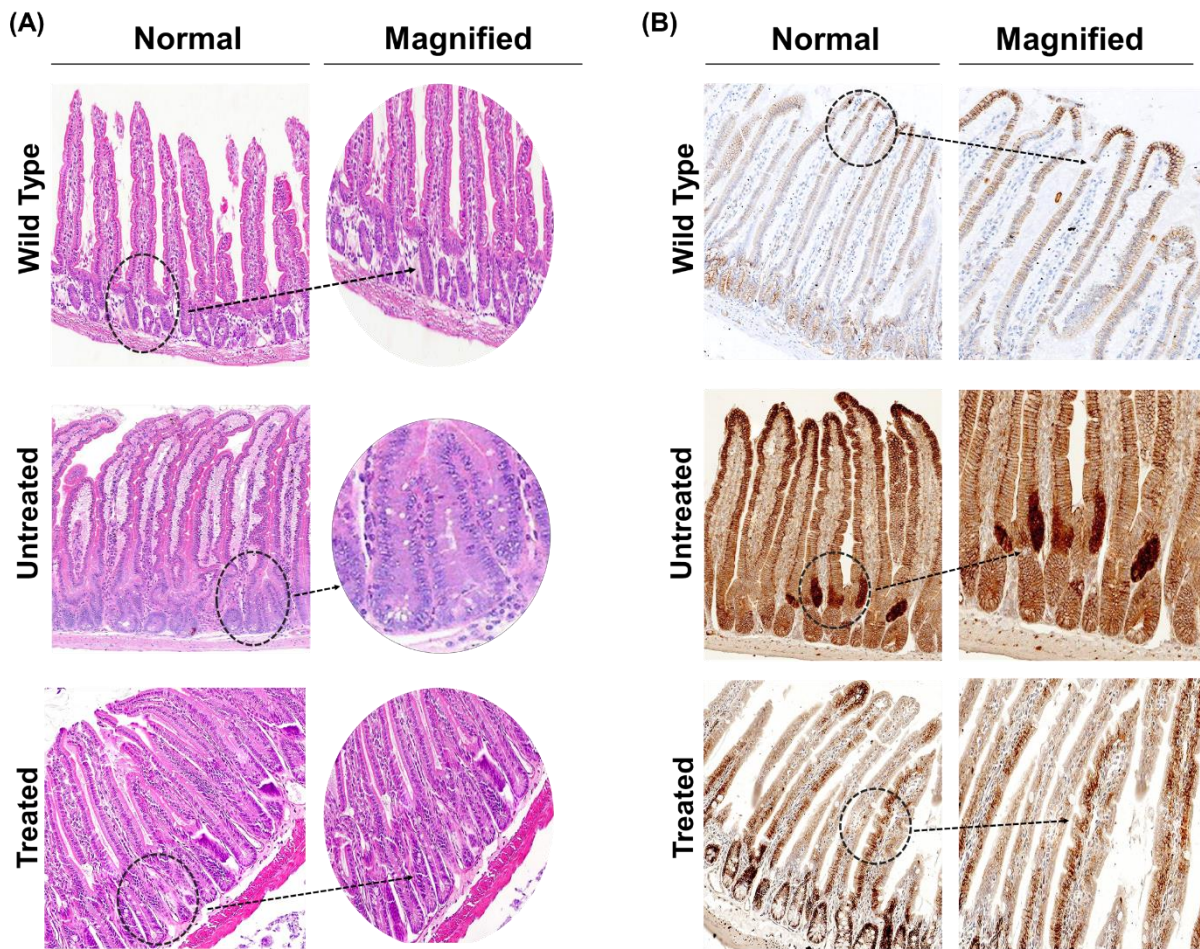

**Supplementary Figure S6:** (A) Hematoxylin and Eosin staining of Wild-type, untreated, and treated cohort samples with Ephb4 shRNA bound to CU-CS-ES nanocomposite complex. Treatment cohort exhibited marked difference as compared to untreated sections, where the gut morphology convalesces to a non-Wnt wild type like state. (B) Immunohistochemical Analysis of  $\beta$ -catenin in the gut sample, Wild-type, untreated, and treatment cohort with Ephb4 shRNA bound to CU-CS-ES nanocomposite complex. Marked circles denotes that Apc deficient mice without treatment has massive translocation of  $\beta$ -catenin in the nucleus, as compared to the treated sections

**Table S1.** Primers used for genotyping of mouse models. Forward and Reverse primers used for genotyping ApC<sup>fl/fl</sup> and Brca2 mice during the breeding program

| PCR                  | Primer Sequences (5' to 3')                                                      | Expected Products         |
|----------------------|----------------------------------------------------------------------------------|---------------------------|
| APC <sup>fl/fl</sup> | APC (F) = GTTCTGTATCATGGAAAGATAGGTGGTC<br>APC (R) = CACTCAAAACGCTTTTGAGGGTTGATTC | HOM = 314bp<br>WT = 226bp |
| Brca2                | Brca2 (F) = TTCTTGCTGGTTTTTGTTTTTC<br>Brca2 (R) = GCTAAATTTAATTGTTTTACAGCC       | Brca2= ~1000bp            |
| CRE                  | CRE (F) = TGACCGTACACCAAATTTG<br>CRE (R) = ATTGCCCTGTTTCACTATC                   | CRE = ~1000bp             |

**Table S2:** Zeta potential of formulations (CU-CS Nanoparticles) from batch 1 to 5

| Sr. No. | Formulation |            | Batch Name | Zeta Potential (mV) | PDI   |
|---------|-------------|------------|------------|---------------------|-------|
|         | CU % (w/v)  | CS % (w/v) |            |                     |       |
| 1.      | 1.0         | -          | 1CU        | -24.78              | 0.247 |
| 2.      | 1.0         | 1.0        | 1CU-1CS    | +51.52              | 0.172 |
| 3.      | -           | 1.0        | 1CS        | +29.77              | 0.218 |
| 4.      | 1.0         | 2.0        | 1CU-2CS    | +55.51              | 0.297 |
| 5.      | -           | 2.0        | 2CS        | +33.54              | 0.282 |



**Table S3.** FTIR peaks of pure CU, CS, ES, CU-CS and CU-CS-ES

| <b>Samples</b> | <b>FTIR peaks (cm<sup>-1</sup>)</b> | <b>Corresponding structure</b> |
|----------------|-------------------------------------|--------------------------------|
| Pure CU        | 3500                                | O–H stretching                 |
|                | 1628                                | C=O stretching                 |
|                | 1509                                | C=C stretching                 |
|                | 1425                                | C–H bending                    |
|                | 1280                                | C–O aromatic stretching        |
|                | 1026                                | C–O–C stretching               |
| Pure CS        | 3450                                | C–H and N–H stretching         |
|                | 2961 and 2921                       | C–H stretching                 |
|                | 1655                                | C=O stretching                 |
|                | 1590                                | N–H bending                    |
|                | 1092                                | C–O stretching                 |
| Pure ES        | 3100 to 3500                        | O–H stretching                 |
|                | 2998 and 2954                       | C–H stretching                 |
|                | 1730                                | C=O stretching                 |
|                | 1450                                | C–H bending                    |
|                | 1150                                | C–O–C stretching               |
| CU-CS          | 3200 to 3600                        | O–H and N–H stretching         |
|                | 1635                                | C=O stretching                 |
|                | 1512                                | C=C stretching                 |
|                | 1430                                | C–H bending                    |
|                | 1280                                | C–O aromatic stretching        |
|                | 1150 and 1026                       | C–O–C stretching               |
| CU-CS-ES       | 3460                                | O–H stretching                 |
|                | 3285                                | N–H stretching                 |
|                | 1640 and 1705                       | C=O stretching                 |
|                | 1560                                | N–H bending                    |
|                | 1412                                | C–H bending                    |
|                | 1020 and 1050                       | C–O–C stretching               |
